# Supplementary material for: Cutting-edge molecular modelling to unveil new microscopic insights into the guest-controlled flexibility of metal–organic frameworks
Source: Royal Society of Chemistry journal article supplement (doi:10.1039/d2sc04174j), 2022-01-01
Supplement: d2sc04174j1.pdf [file d2sc04174j1.pdf]

# Cutting-Edge Molecular Modelling to Unveil New Microscopic Insights into the Guest-Controlled Flexibility of Metal-Organic Frameworks

Hengli Zhao,<sup>†,‡</sup> Camille Pelgrin-Morvan,<sup>†</sup> Guillaume Maurin,<sup>‡</sup> and Aziz  
Ghoufi<sup>\*,†</sup>

<sup>†</sup>*Institut de Physique de Rennes, IPR, CNRS-Université de Rennes 1, UMR CNRS  
6251, 35042 Rennes, France.*

<sup>‡</sup>*ICGM, Univ. Montpellier, CNRS, ENSCM, Montpellier 34293, France.*

E-mail: aziz.ghoufi@univ-rennes1.fr

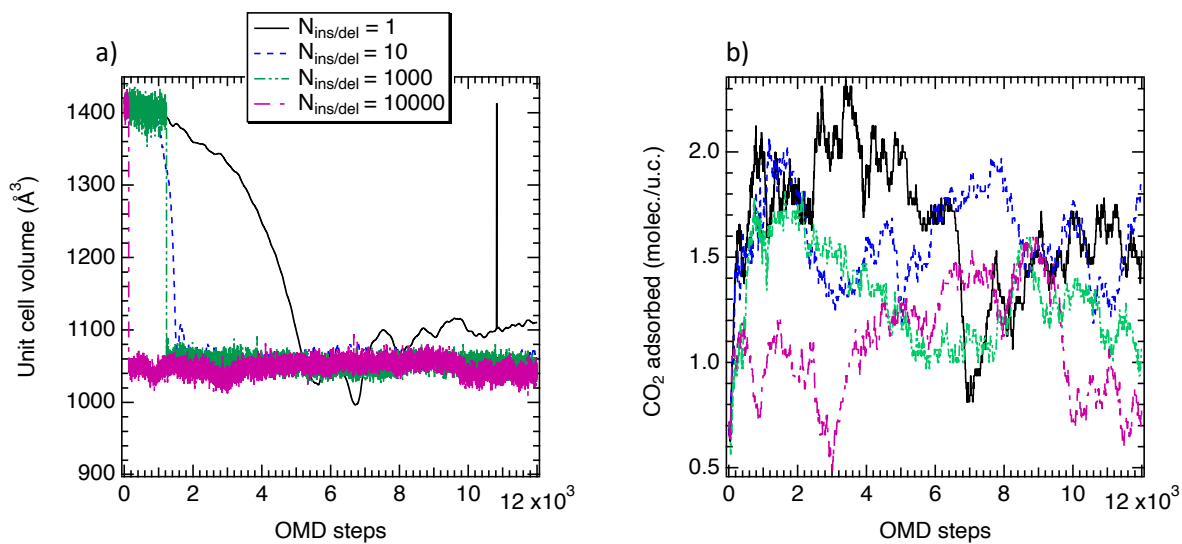

Figure S1: a) Unit cell volume a) and b)  $\text{CO}_2$  adsorbed as a function of the time for four  $N_{ins/del}$  corresponding to the time interval ( $t_{ins/del}$ ). Gas pressure is 0.5 bar and temperature corresponds to 298 K.

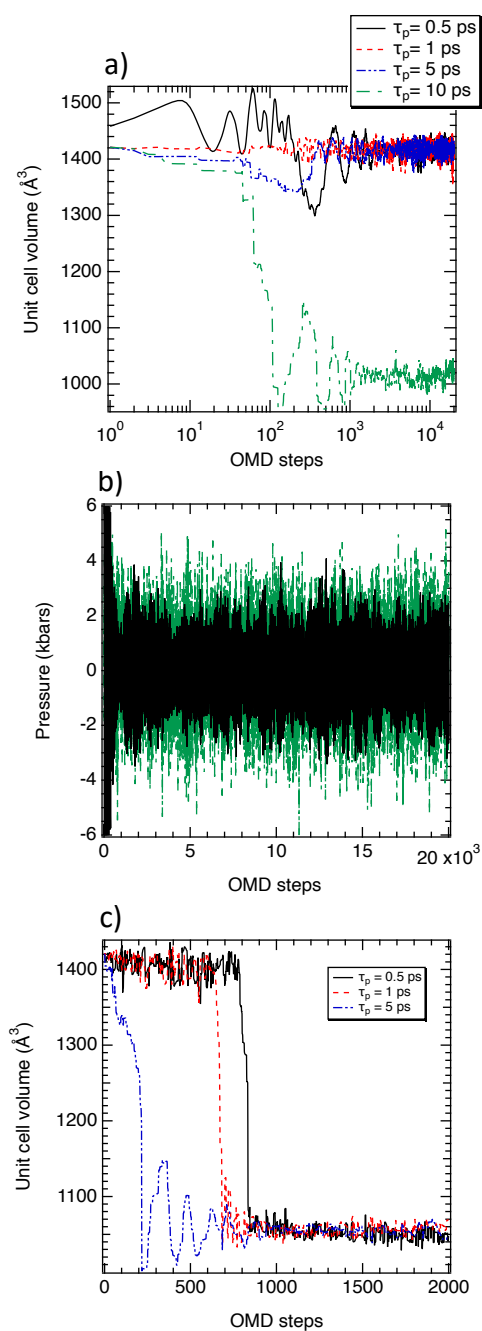

Figure S2: a) Unit cell volume of MIL-53(Cr)@CO<sub>2</sub> and b) total pressure for a CO<sub>2</sub> fugacity of 0.1 bar at 298 K. c) unit cell volume of MIL-53(Cr)@CO<sub>2</sub> for a CO<sub>2</sub> fugacity of 0.5 bar at 298 K. Three parts are provided for several relaxation times ( $\tau_p$ ) controlling the pressure fluctuations through the barostat.

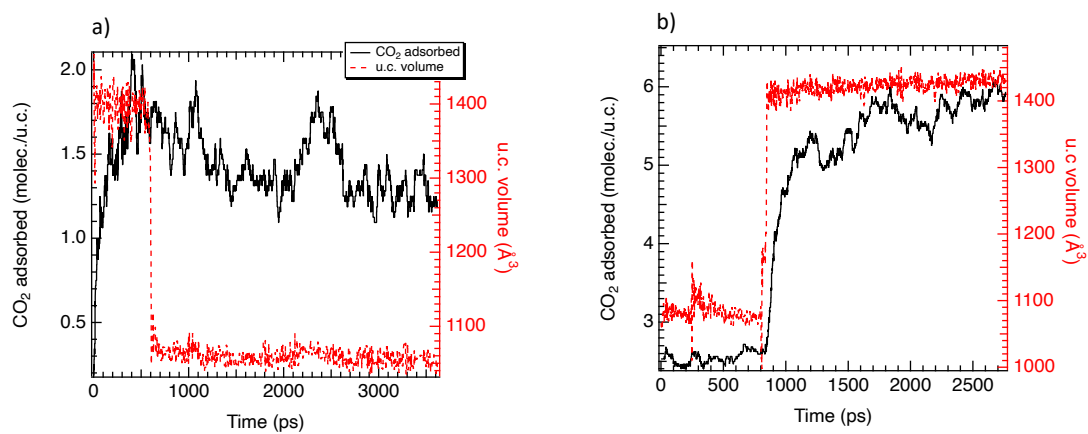

Figure S3: Unit cell volume of MIL-53(Cr)@CO<sub>2</sub> (right axis) and CO<sub>2</sub> adsorbed (left axis) for a CO<sub>2</sub> fugacity of a) 0.5 bar and b) 5.0 bar at 298 K.

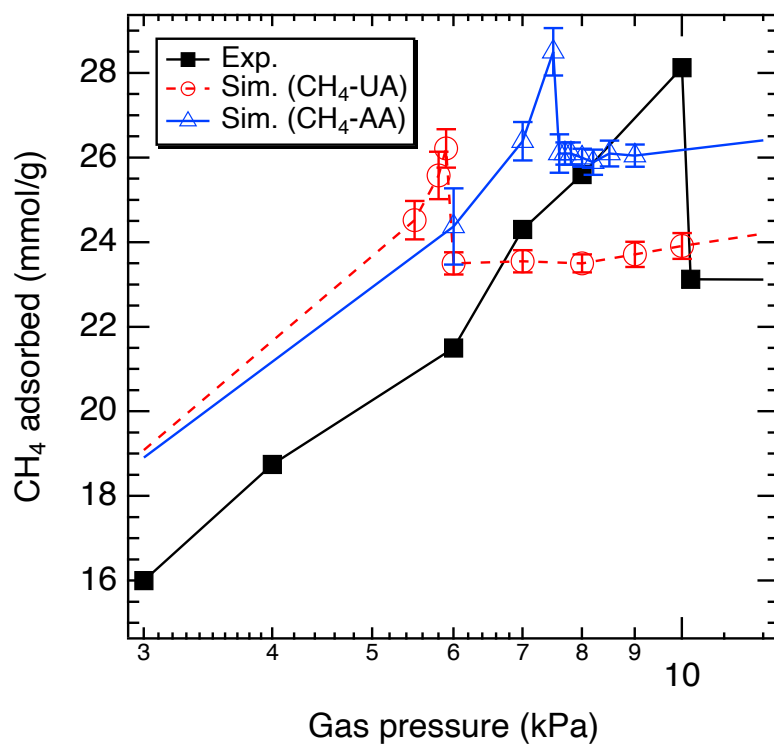

Figure S4: Simulated and experimental CH<sub>4</sub> adsorption isotherm at 111 K on DUT-49 as semi-logarithmic scale. CH<sub>4</sub> molecules were described from the all atoms (AA) and united atom (UA) force fields.

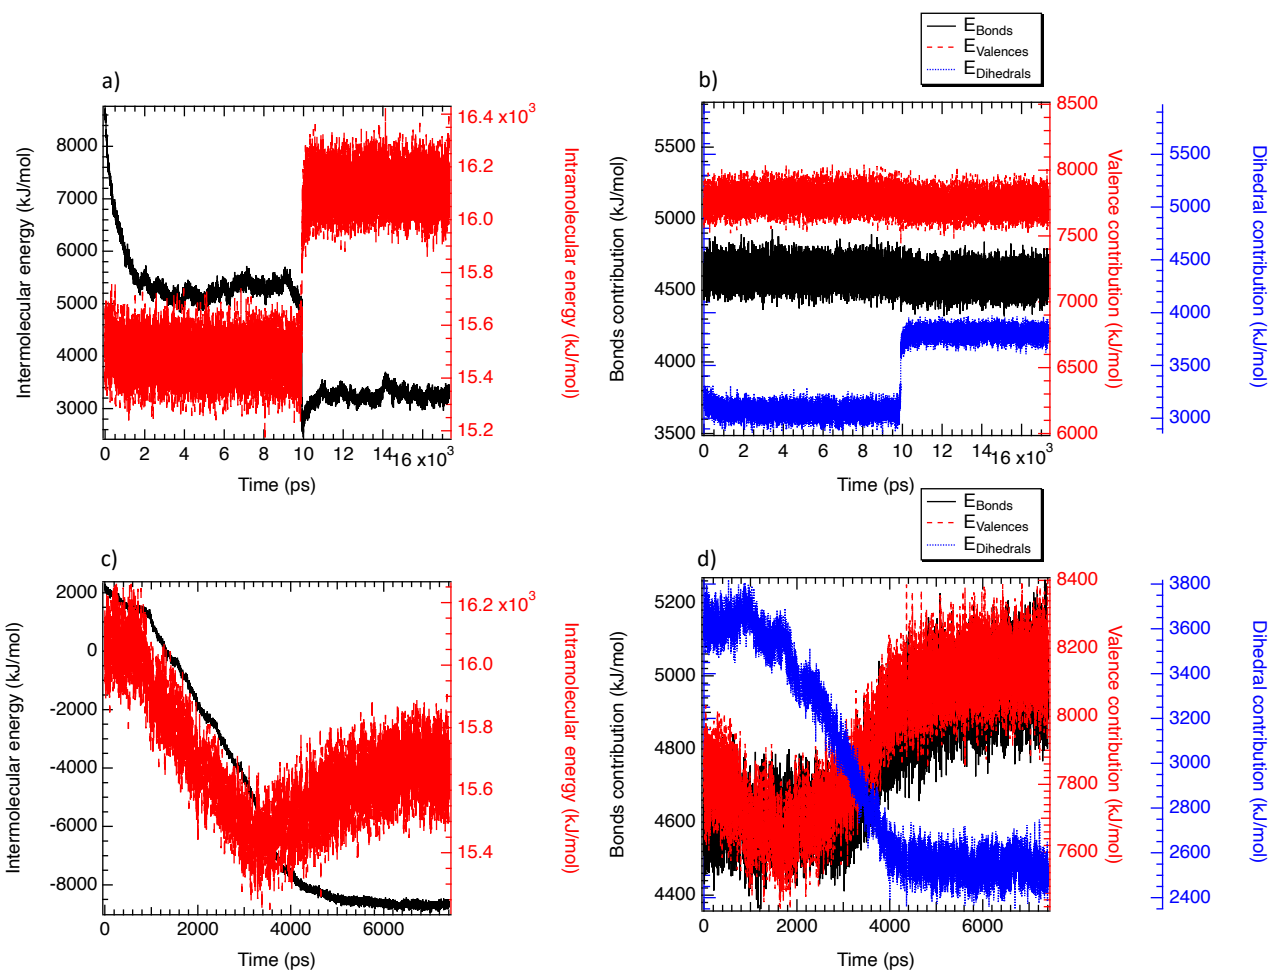

Figure S5: Intermolecular and intramolecular contribution during the *op* → *cp* transition (a) and b)) for a  $\text{CH}_4$  fugacity of 6 kPa. and from the reopening (c) and d)) for a  $\text{CH}_4$  fugacity of 500 kPa.

---

Table S1: Unit cell parameters; volume and lengths (a,b,c). The average error bar on a, b and c is around 0.4 Å.

| DUT-49 form | u.c. volume (Å <sup>3</sup> ) | a=b=c (Å) |
|-------------|-------------------------------|-----------|
| 1           | 101298.8                      | 46.6      |
| 2           | 92718.4                       | 45.2      |
| 3           | 89359.1                       | 44.7      |
| 4           | 75980.0                       | 42.4      |
| 5           | 60253.1                       | 39.2      |
| 6           | 45491.1                       | 35.7      |
| 7           | 44954.6                       | 35.6      |
| 8           | 45668.0                       | 35.7      |
| 9           | 104429.5                      | 47.1      |
